1 **The effect of community dialogues and sensitization on patient reporting of adverse**  
2 **events in rural Uganda: uncontrolled before-after study**

3

4 **Helen Byomire Ndagije<sup>¶1\*</sup>, Leonard Manirakiza<sup>¶1</sup>, Dan Kajungu<sup>¶2</sup>, Edward Galiwango<sup>2</sup>, Donna**  
5 **Kusemererwa<sup>1</sup>, Sten Olsson<sup>&3</sup>, Anne Spinewine<sup>&4</sup>, Niko Speybroeck<sup>&4</sup>.**

6

7 *<sup>1</sup>National Pharmacovigilance Centre, National Drug Authority, Kampala Uganda*

8 *<sup>2</sup>Makerere University Centre for Health and Population Research, Iganga Uganda*

9 *<sup>3</sup>Sten Olsson Pharmacovigilance Consulting, Uppsala Sweden*

10 *<sup>4</sup>Institute of Health and Society (IRSS), Université catholique de Louvain, Brussels Belgium*

11

12

13 **\*Corresponding Author: Helen Byomire Ndagije, [hbyomire@nda.or.ug](mailto:hbyomire@nda.or.ug)**

14 <sup>¶</sup> These authors contributed equally to this work.

15 <sup>&</sup>These authors also contributed equally to this work.

16

17

18 **Abstract**

19 **Background:** The patients that experience adverse events are in the best position to report  
20 them, only if they were empowered to do so. Systematic community engagement and support  
21 to patients in a rural setting to monitor any potential harm from medicines should provide  
22 evidence for patient safety.

23

24 **Methods:** This paper describes an uncontrolled before and after study aimed at assessing the  
25 effect of a community engagement strategy, the Community Dialogues and Sensitization  
26 (CDS) intervention between January and April 2017, on the knowledge, attitude and practice  
27 of reporting adverse drug events by community members in the two eastern Ugandan districts.

28 A representative cross-sectional baseline household survey was done prior to the intervention  
29 in September 2016 (n=1034) and the end-line survey (n=827) in July 2017.

30 **Results:** After implementation of the CDS intervention, there was an overall 20% (95% CI=16-  
31 25) increase in awareness about adverse drug events in the community. The young people (15-  
32 24 years) demonstrated a 41% (95% CI =31-52) increase and the un-educated showed a 50%  
33 (95% CI=37-63) increase in awareness about adverse drug events. The attitudes towards  
34 reporting increased overall by 5% in response to whether there was a need to report ADEs  
35 (95% CI =3-7). An overall 115% (95% CI =137-217) increase in the population that had ever  
36 experienced ADEs was also reported.

37 **Conclusion:** Our evaluation shows that the CDS intervention increases knowledge, improves  
38 attitudes by catalyzing discussions among community members and health workers on health  
39 issues and monitoring safety of medicines.

40 **Key words:**

41 **Patient adverse drug event reporting, community dialogue and sensitization, rural health**  
42 **setting**

## 44 **Background**

45

46 Globally, adverse drug reactions account for up to 18% of hospital deaths 1-5. An adverse  
47 event is defined as any untoward medical occurrence in a patient administered a medicinal  
48 product and which does not necessarily have to have a causal relationship with the treatment,  
49 including worsening of the clinical condition<sup>6</sup>. Like many resource- limited countries, Uganda  
50 uses spontaneous reporting of suspected adverse drug events (ADE) predominantly by health  
51 workers to monitor the safety of medicines<sup>7</sup>. However, one of the biggest inherent limitations  
52 of this method is under-reporting. In as much as the Ugandan pharmacovigilance regulations  
53 of 2014 require healthcare professionals to report adverse drug events, the grossly under-  
54 resourced health sector makes it hard for health workers to report them<sup>8</sup>. A recent study  
55 reported an incidence of 25% of hospital-acquired suspected ADEs among Uganda inpatients<sup>9</sup>.  
56 Antibiotics and anti-malarials have been the most commonly implicated drugs in community-  
57 acquired ADEs in surveys of healthcare professionals<sup>10</sup>. With increased access and use of  
58 medicines in the community, it is becoming increasingly important to collect more safety  
59 information by involving the patients directly. However, healthcare professionals become less  
60 involved in patient treatment thus minimizing their role in healthcare delivery. The Ugandan  
61 National Pharmacovigilance Centre (NPC) has its main goal of promoting patient safety by  
62 monitoring adverse drug reactions. It intends to implement a program of a dialogue-based  
63 intervention aimed at encouraging community members to report and possibly contribute to  
64 prevention of adverse drug events and any drug-related issues in the community.

65 The Community Dialogue and Sensitization (CDS) approach was a hybrid modification of the  
66 community dialogue (CD) previously used to stimulate community support and engagement in  
67 the context of integrated community case management (iCCM) of childhood diarrhoea,  
68 pneumonia and malaria by Malaria Consortium in Zambia, Mozambique and Uganda<sup>11</sup>. The

69 CDS model added a sensitization campaign using radio messages, posters and brochures to  
70 raise drug-safety awareness encourage dialogue and involve the community in designing  
71 solutions to pertinent issues. This approach involved a participatory communication process  
72 of sharing information through existing community-based structures and aimed to enable  
73 communities make informed choices and to take individual and collective action.

74 The CDS model assumed that the respondents knew the common diseases that affected the  
75 population across different ages and the treatment they often received. We assumed that the  
76 respondents knew the different common points of care in the community. Another assumption  
77 made was that the community members were familiar with the adverse events that they  
78 commonly experienced as well as the reporting channels in the community for the different  
79 service providers. This model assumed that respondents did not know that it was their right to  
80 report ADEs and their obligation to give feedback on ADEs to the national medicine  
81 regulatory authority to improve drug safety in the country. Some community members  
82 therefore had misconception about reporting ADEs and some patients accessed drugs through  
83 the most convenient avenues to them.

84 The messages developed for this study focused on informing communities that any drug was  
85 capable of causing ADEs and monitoring them was essential in improving drug safety. This  
86 paper describes an uncontrolled before and after study aimed at assessing the effect of a  
87 community engagement strategy, the Community Dialogues and Sensitization between  
88 January and April 2017, on the knowledge, attitude and practice of reporting ADEs by  
89 community members in the two eastern Ugandan districts

90

91

## 92 **Materials and methods**

### 93 **Context**

94 The CDS intervention was implemented in two predominantly rural districts of Iganga and  
95 Mayuge in Eastern Uganda. This area hosts a health and demographic surveillance site that  
96 works closely with the communities, health facilities and the district health office. The  
97 Iganga-Mayuge health and demographic surveillance site (IMHDSS) is run by Makerere  
98 University Centre for Health and Population Research (MUCHAP). The population here is a  
99 very young. About half is under 15 years and a total birth rate of five children. The IMHDSS  
100 population is largely homogeneous with 83% being from a single tribal-group, the Basoga. At  
101 the IMHDSS, there is bi-annual update of individual and household data conducted between  
102 February-May and August-November in the 65 villages. The updates contain information on  
103 pregnancy registrations and outcomes, in and out-migrations, births and deaths. Prior to each  
104 round, an information officer from each village gives feedback from the previous round and  
105 identifies the 35 data collectors for a 2-day training.

106

### 107 **The Intervention: Community Dialogue and Sensitization**

108 The implementation team conducted a preliminary audience evaluation to understand the  
109 community needs and interests, gauge reactions to different communication strategies and  
110 identify preferences for various prototype materials. The National Pharmacovigilance Centre  
111 and MUCHAP jointly developed the CDS toolkit. The toolkit included a facilitators' guide-  
112 book with ten repeatable steps- key talking points, pictorial posters, and a monitoring and  
113 feedback tool. Tools and images were pre-tested with the target audience before finalizing the  
114 toolkit The CDS intervention included several components (See table 1) conducted between  
115 December 2016 and April 2017. The CDS meetings began after the official launch of the  
116 project. The goal of the community dialogue meetings was to improve the knowledge of the  
117 community members, about ADEs, improve attitude towards reporting ADEs and to  
118 minimize barriers to reporting ADEs. The primary target audience were the primary  
119 household member in charge of health care decisions, private health care providers, health

120 workers at different levels, drug shop operators, pharmacies, district policy makers where  
121 possible, and patients.

122

123 After a courtesy visit to the district health office, the team explained the planned activities to  
124 the district health officer, district drug inspector and the district health educator. The teams  
125 went out in pairs composed of a community health worker and a note-taker from MUCHAP.  
126 The team enlisted the help of the local council heads to introduce them to the community to  
127 gain the acceptance of community members. Mobilization took the form of public  
128 announcements in churches, mosques, village meetings and women groups, a day before the  
129 CDS meeting. Announcement messages included the purpose, day, time and venue of the  
130 meeting. Teams emphasized to community members that the meeting would contain  
131 information that is important to their health and well-being.

132

133 During the community dialogue, a local leader or elder opened the session and introduced the  
134 team. The team leader then explained the purpose of the meeting and stimulated the dialogue  
135 into the ten-step process of the CDS toolkit and the talking points around ADEs. Community  
136 dialogues provided communities with the opportunity to discuss extensively within their  
137 villages, newly available healthcare services like patient ADE reporting. In addition, the  
138 members discussed how they could best benefit from the CDS approach and support it. In  
139 each village as far as possible, there were separate men and women's meetings.

140

141

142

143

144

145 **Table 1: Multiple interventions used to improve patient reporting**

| Intervention Components            | Description                                                                                                                                                                                                                                                                                                                                                                                                                                                                                                                                                                                                                                                                                 | Beneficiaries                                                |                                                                                                     | Deliverers                                                                     |
|------------------------------------|---------------------------------------------------------------------------------------------------------------------------------------------------------------------------------------------------------------------------------------------------------------------------------------------------------------------------------------------------------------------------------------------------------------------------------------------------------------------------------------------------------------------------------------------------------------------------------------------------------------------------------------------------------------------------------------------|--------------------------------------------------------------|-----------------------------------------------------------------------------------------------------|--------------------------------------------------------------------------------|
|                                    |                                                                                                                                                                                                                                                                                                                                                                                                                                                                                                                                                                                                                                                                                             | Individual                                                   | Others                                                                                              |                                                                                |
| <b>Community dialogue meetings</b> | <p><b>Mobilization:</b> The team of the CHW &amp; MUCHAP information officer enlisted support of district health office and the local council leaders. The LC provided access to the community. Public announcements about the CDS were made in churches, mosques, village meetings &amp; women groups a day prior to the meeting.</p> <p><b>Intervention activities:</b> The CHW &amp; MUCHAP information officer conducted the CDS using the CDS toolkit containing the Facilitator's 10-step process, ADE pictorial posters and brochures in the local language, Lusoga. Forty CDSs were conducted January to April 2017</p> <p><b>Reach:</b> 658 participants (139 men, 519 women).</p> | Primary household member in charge of health care decisions, | Community members<br>Community leaders                                                              | CHW<br>MUCHAP information officer                                              |
| <b>Radio messages</b>              | <p>Radio spot messages aimed at raising community awareness were aired 3 times a day (8am, 1pm &amp; 9pm) for three days in a week (Monday, Wednesday &amp; Friday).</p> <p>Period of airing: January to April 2017</p> <p>The messages were developed by NDA &amp; MUCHAP</p>                                                                                                                                                                                                                                                                                                                                                                                                              | Patients and care-givers in the community                    | Community members, district, religious & village leaders, private & public health service providers | 3 radio stations NBS FM, R FM & Safari FM covering Iganga and Mayuge districts |
| <b>Focus Group discussions</b>     | FGDs in Public health facilities and FGDs which included health workers and some community members.                                                                                                                                                                                                                                                                                                                                                                                                                                                                                                                                                                                         | Community members                                            | Private & public health care providers,                                                             | MUCHAP information officer                                                     |
| <b>Brochures</b>                   | Distributed 2000 Lusoga brochures to participants in their households and communities with information about ADEs and encouraging reporting of the suspected ADEs during the HDSS routine data collection by Field assistants                                                                                                                                                                                                                                                                                                                                                                                                                                                               | Household members                                            | Community members                                                                                   | MUCHAP field assistants                                                        |
| <b>ADE posters</b>                 | Distributed 500 posters to private and public health facilities encouraging ADE reporting with some guidelines of how and where to report them                                                                                                                                                                                                                                                                                                                                                                                                                                                                                                                                              | Health workers                                               | Community members<br>Private & public health facilities                                             | MUCHAP staff                                                                   |
| <b>ADE reporting forms</b>         | Distribution of 70 booklets of 25 ADE carbonated reporting forms was accompanied by sensitization of the health workers about                                                                                                                                                                                                                                                                                                                                                                                                                                                                                                                                                               | Health workers in Iganga & Mayuge                            | Health workers beyond                                                                               | MUCHAP staff<br>NDA staff                                                      |

|                 | pharmacovigilance                                                                                                                                                                                                                                                                      |                | implementation districts                         |                                          |
|-----------------|----------------------------------------------------------------------------------------------------------------------------------------------------------------------------------------------------------------------------------------------------------------------------------------|----------------|--------------------------------------------------|------------------------------------------|
| <b>Advocacy</b> | An official launch of the CDS approach to create more awareness about the well-being of the community and the importance of ADE reporting. Posters and brochures were also distributed, 16 <sup>th</sup> December 2016<br>Courtesy call to the district health office by NDA officials | Not applicable | District health authorities<br>Community leaders | NDA staff<br>MUCHAP staff<br>Journalists |

146 CHW=Community Health Worker, MUCHAP= Makerere University Centre for Health and Population Research, ADE=Adverse Drug Event, NDA=National Drug Authority,  
147 CDS= Community Dialogue and Sensitization, LC=Local Council



148

149 **Study design, respondents and sampling**

150 This uncontrolled before and after study was conducted between September 2016 and August

151 2017 in the Iganga/Mayuge Health Demographic Surveillance Site (IDMSS). Prior to the

152 CDS intervention in September 2016 and the end-line survey in July 2017, we conducted a

153 representative cross-sectional-baseline household survey. The entire adult population of the

154 study area was considered as the sampling domain, where all households were eligible for

155 selection. The total sample size of 778 for each survey was calculated in order to allow for a

156 comparison of proportions between two groups, i.e. baseline and end-line respondents.

157 Assuming a baseline proportion with an acceptable level  $\rho$  of 0.5, and testing at the 0.05

158 level, a sample size of 389 for each survey was determined to give 80 per cent power to

159 detect a change of at least ten per cent of the primary outcome. To allow adjustment for

160 confounders, non-response and design effect, we doubled the sample size, to obtain the

161 required sample size. Sampling involved a single-stage household sampling. In each of the 65

162 villages in the IMHDSS surveillance area, the study team sampled an equal number of

163 households using a simple random sampling approach with the help of community leaders.

164 For the purpose of the surveys, a household was defined as a group of people who routinely

165 lived and ate together. One person per selected household was interviewed. The target for

166 interviews was the person best placed to answer questions about the household's health in the

167 community members' questionnaire (Additional file # 1). All community based health

168 facilities in the intervention area were included in the survey. At least two healthcare workers

169 from each health facility were randomly selected and interviewed using a specific healthcare

170 provider questionnaire (Additional file # 2). The facilities considered were both private and

171 public owned and these included hospitals, health centre VI-II, pharmacies, drug shops and

172 shops that sell drugs with other merchandise.

173

174 **Data collection**

175 A quantitative assessment of target communities' knowledge, attitudes and practices of  
176 patient ADE reporting was done using identical questions before and after the CDS  
177 intervention.

178

179 Interviews were carried out by local field researchers, using a pre-tested structured and  
180 validated questionnaire translated in the local language (Lusoga). The field researchers were  
181 instructed to read out the survey questions exactly as rendered on the questionnaire.

182 Instructions for field researchers with regard to whether the question required a single  
183 response or whether multiple responses were possible and answer options were provided in  
184 the questionnaire in English. Answer options were not read out aloud and field researchers  
185 were instructed not to suggest answers to the respondent. An 'other' category was provided  
186 for most questions and field researchers were instructed to note down respondents' answers if  
187 they could not clearly assign the answer to an existing answer category.

188

189 All field team members had previous experience of conducting or supervising field research.  
190 Field researchers and supervisors attended a two-day training course covering data collection  
191 tools, field procedures and interview techniques. Field supervisors received an additional  
192 days' training focusing on supervision of field teams as well as the sampling process.

193 Following the pre-test, a half-day training session was conducted to discuss challenges  
194 identified during the pre-test. The training materials were prepared by MUCHAP and NDA  
195 and the training was conducted by MUCHAP, who were responsible for coordination and  
196 supervision during the field work. Field supervisors were tasked with monitoring the quality  
197 of the data collected and seeking clarification from the field researchers where necessary. At  
198 the end of each day, they were responsible for conducting a feedback meeting with their  
199 team, giving researchers the opportunity to discuss and resolve challenges and providing

200 feedback and training to the team as appropriate. They reported to the study coordinator  
201 daily, summarizing progress made, challenges encountered and discussing field work to be  
202 completed on the following day.

203

#### 204 **Data entry and analysis**

205 Data entry was done using EpiData 3.1 (EpiData Association) software by ten trained data  
206 entry officers. All records were double entered to ensure accuracy. First and second entries  
207 were done by different data entry officers for each village. Where differences between first and  
208 second entry were detected, data were verified by checking the record against the paper  
209 questionnaire. If in doubt, data entry officers were instructed to log their query and discuss it  
210 with the study coordinator. The data was transferred to STATA Version 12 (StataCorp LP) for  
211 further consistency checks and preparation for analysis. All percentages reported are  
212 population average estimates which have been adjusted to take into account the clustering of  
213 the study design. Responses recorded under ‘other’ by field researchers were reviewed and  
214 either re-assigned to an existing answer category, assigned to a new answer category or left in  
215 the ‘other’ category. All comparisons were done at 5% level of significance and 95%  
216 confidence intervals for the mean difference were constructed to test the significance of the  
217 difference before and after the intervention.

218

#### 219 **Outcome measures**

220 The primary outcomes measured comprised of the percentage differences between the  
221 knowledge, attitudes and practice of reporting before and after the CDS intervention.  
222 Knowledge was measured by the responses from the question “Do drugs “cause” negative or  
223 side effects?” For the respondents who answered “yes”, to the above question, their attitude  
224 towards reporting adverse drug effects was measured by asking if they considered it necessary  
225 to report an adverse drug effect. To understand the respondents’ practices, we asked them if

226 they would report any ADE if encountered. The secondary outcome of this study was to  
227 establish the best ways to engage the community and this was included as part of the  
228 questionnaire during the surveys.

229

## 230 **Results**

### 231 **Description of Survey respondents**

232 There were 1034 respondents that participated in the baseline survey (before implementation  
233 of the CDS model) and 827 participated in the end-line survey. These were house-hold adult  
234 members who consented to our interview. All the participants that were recruited in the study  
235 consented to participate. There was a big positive difference in knowledge, attitudes and  
236 practices of respondents regarding reporting ADE between the baseline and end-line surveys.  
237 This is true though the number in baseline were more than those in end-line survey. Table 2  
238 summarizes survey respondents' profile in terms of age, education, religion and occupation.

239

240 **Table 2: Community member description by social demographic characteristics**

|                   | <b>Baseline n (%) N=1034</b> | <b>End line n (%) N=827</b> |
|-------------------|------------------------------|-----------------------------|
| <b>Age group</b>  |                              |                             |
| 15-24             | 163 (15.8)                   | 137(16.6)                   |
| 25-34             | 304 (29.4)                   | 224(27.1)                   |
| 35-44             | 243 (23.5)                   | 200(24.2)                   |
| 45-54             | 145 (14.0)                   | 138(16.7)                   |
| 55-64             | 105 (10.2)                   | 54(6.5)                     |
| 65+               | 74 (7.2)                     | 74(9.0)                     |
| <b>Education</b>  |                              |                             |
| None              | 147 (14.2)                   | 90(10.9)                    |
| Primary           | 532 (51.5)                   | 422(51.0)                   |
| Secondary         | 310 (29.9)                   | 265(32.0)                   |
| Tertiary          | 23 (2.2)                     | 27(3.3)                     |
| University        | 22 (2.1)                     | 23(2.8)                     |
| <b>Religion</b>   |                              |                             |
| Anglican          | 246 (23.8)                   | 251(30.4)                   |
| Roman catholic    | 93 (9.0)                     | 82(9.9)                     |
| Pentecostal       | 103 (10.0)                   | 103(12.5)                   |
| Muslim            | 573 (55.4)                   | 380(46.0)                   |
| Other             | 19 (1.8)                     | 10(1.2)                     |
| <b>Occupation</b> |                              |                             |
| Professional      | 29 (2.8)                     | 42(5.1)                     |
| Self employed     | 562 (54.4)                   | 203(24.6)                   |
| Student           | 24 (2.3)                     | 16(1.9)                     |
| Peasant           | 175 (16.9)                   | 342(41.4)                   |
| Domestic work     | 241 (23.3)                   | 127(15.4)                   |
| Other             | 3 (0.3)                      | 96(11.6)                    |

241

242 **Knowledge about adverse drug reactions**

243 After implementation of community dialogues about adverse drug events and reporting, there

244 was an overall 20% increase in knowledge about ADEs in the community. Disaggregating

245 knowledge of ADEs by background characteristics, revealed an even distribution positive

246 change but higher (41.1%, 95% CI =31-52) among young people (15-24years), those with no  
247 education (50%, 95% CI=37-63) as shown in table 3.

249 *Table 3: Knowledge of ADEs by respondent demographic characteristics before and after the CDS intervention*

| Do drugs “cause” negative or side effects? |                   |                   |             |            |                  |                   |              |                    |                |                 |              |                    |
|--------------------------------------------|-------------------|-------------------|-------------|------------|------------------|-------------------|--------------|--------------------|----------------|-----------------|--------------|--------------------|
|                                            | Yes               |                   |             |            | No               |                   |              |                    | DK             |                 |              |                    |
|                                            | Before            | After             | % age diff. | 95% CI     | Before           | After             | % age diff.  | 95% CI             | Before         | After           | % age diff.  | 95% CI             |
| <b>Age category</b>                        |                   |                   |             |            |                  |                   |              |                    |                |                 |              |                    |
| 15-24                                      | 86 (52.8)         | 102 (74.5)        | 41.1        | 0.31-0.52  | 63 (38.7)        | 33(24.1)          | -37.73       | -0.57--0.19        | 14(8.6)        | 2(1.5)          | -82.56       | -1.22--0.43        |
| 25-34                                      | 173 (56.9)        | 151 (67.4)        | 18.5        | 0.10-0.27  | 110(36.2)        | 67(29.9)          | -17.40       | -0.32--0.03        | 21(6.9)        | 6(2.7)          | -60.87       | -0.82--0.39        |
| 35-44                                      | 145 (59.7)        | 137 (68.5)        | 14.7        | 0.06-0.24  | 84(34.6)         | 55(27.5)          | -20.52       | -0.36--0.05        | 14(5.8)        | 8(4)            | -31.03       | -0.50--0.12        |
| 45-54                                      | 79 (54.5)         | 87 (63.5)         | 16.5        | 0.05-0.28  | 51(35.2)         | 43(31.4)          | -10.80       | -0.30-0.08         | 15(10.3)       | 7(5.1)          | -50.49       | -0.76--0.25        |
| 55-64                                      | 54 (51.4)         | 37 (68.5)         | 33.3        | 0.18-0.49  | 37(35.2)         | 13(24.1)          | -31.53       | -0.59--0.04        | 14(13.3)       | 4(7.4)          | -44.36       | -0.80--0.08        |
| 65+                                        | 45 (60.8)         | 46 (62.2)         | 2.3         | -0.13-0.18 | 26(35.1)         | 25(33.8)          | -3.70        | -0.30-0.22         | 3(4.1)         | 3(4.1)          | 0.00         | -0.32-0.32         |
| <b>Education</b>                           |                   |                   |             |            |                  |                   |              |                    |                |                 |              | 0.00-0.00          |
| None                                       | 50 (34.0)         | 46 (51.1)         | 50.3        | 0.37-0.63  | 79(53.7)         | 37(41.1)          | -23.46       | -0.43--0.04        | 18 (12.2)      | 7(7.8)          | -36.07       | -0.63--0.09        |
| Primary                                    | 294 (55.3)        | 273 (64.8)        | 17.2        | 0.11-0.23  | 191(35.9)        | 132(31.4)         | -12.53       | -0.23--0.02        | 47(8.8)        | 16(3.8)         | -56.82       | -0.72--0.42        |
| Secondary                                  | 199 (64.2)        | 193 (72.8)        | 13.4        | 0.06-0.21  | 95(30.6)         | 65(24.5)          | -19.93       | -0.34--0.06        | 16(5.2)        | 7(2.6)          | -50.00       | -0.68--0.32        |
| Tertiary                                   | 19 (82.6)         | 25 (92.6)         | 12.1        | -0.06-0.30 | 4(17.4)          | 2(7.4)            | -57.47       | -1.09--0.06        | 0(0)           | 0(0)            | 0.00         | 0.00-0.00          |
| University                                 | 20 (90.9)         | 23 (100)          | 10.0        | -0.02-0.22 | 2(9.1)           | 0(0)              | -100.00      | -1.40--0.60        | 0(0)           | 0(0)            | 0.00         | 0.00-0.00          |
| <b>Religion</b>                            |                   |                   |             |            |                  |                   |              |                    |                |                 |              | 0.00-0.00          |
| Anglican                                   | 140 (56.9)        | 174 (69.3)        | 21.8        | 0.13-0.3   | 91(37)           | 69(27.5)          | -25.68       | -0.40--0.11        | 15(6.1)        | 8(3.2)          | -47.54       | -0.66--0.29        |
| Roman Catholic                             | 59 (63.4)         | 56 (68.3)         | 7.7         | -0.06-0.22 | 29(31.2)         | 23(28)            | -10.26       | -0.35-0.15         | 5(5.4)         | 3(3.7)          | -31.48       | -0.62--0.01        |
| Pentecostal                                | 65 (63.1)         | 77 (74.8)         | 18.5        | 0.06-0.31  | 30(29.1)         | 25(24.3)          | -16.49       | -0.40-0.07         | 8(7.8)         | 1(1.0)          | -87.18       | -1.40--0.34        |
| Muslim                                     | 308 (53.8)        | 244 (64.2)        | 19.3        | 0.13-0.26  | 217(37.9)        | 118(31.1)         | -17.94       | -0.28--0.07        | 48(8.4)        | 18(4.7)         | -44.05       | -0.58--0.30        |
| Other                                      | 10 (52.6)         | 9 (90)            | 71.1        | 0.42-1.00  | 4(21.1)          | 1(10)             | -52.61       | -1.24-0.19         | 5(26.3)        | 0(0)            | -100.00      | 0.00-0.00          |
| <b>Overall</b>                             | <b>582 (56.3)</b> | <b>560 (67.8)</b> | 20.4        | 0.16-0.25  | <b>371(35.9)</b> | <b>236(28.57)</b> | <b>-0.20</b> | <b>-0.28--0.13</b> | <b>81(7.8)</b> | <b>30(3.63)</b> | <b>-0.53</b> | <b>-0.64--0.43</b> |

250 ADE=Adverse Drug Event, DK=Don't Know, CI=Confidence Interval

251

252

253 **Attitudes about reporting adverse drug effects**

254 In response to whether there it was necessary to report the adverse drug effects, there was an

255 overall increase of 4.6% after the implementation of the CDS intervention. The difference in

256 attitude after the intervention is presented in table 4 by social demographic characteristics of

257 age, education and religion.



258 *Table 4: Necessity to report adverse drug events by social demographic characteristics before and after the CDS intervention*

|                     | Yes              |                  |             |            | No             |                |               |                | DK             |               |               |                |
|---------------------|------------------|------------------|-------------|------------|----------------|----------------|---------------|----------------|----------------|---------------|---------------|----------------|
|                     | Before           | After            | % age diff. | 95% CI     | Before         | After          | % age diff.   | 95% CI         | Before         | After         | % age diff.   | 95% CI         |
| <b>Age category</b> |                  |                  |             |            |                |                |               |                |                |               |               |                |
| 15-24               | 144 (88.3)       | 133 (97.1)       | 9.97        | 4-16       | 12 (7.4)       | 4 (2.9)        | -60.81        | -88--33        | 7 (4.3)        | 0 (0)         | -100.00       | 0              |
| 25-34               | 288 (94.7)       | 214 (95.5)       | 0.84        | -3-5       | 8 (2.6)        | 8 (3.6)        | 38.46         | 21-55          | 8 (2.6)        | 2 (0.9)       | -65.38        | -88--42        |
| 35-44               | 227 (93.4)       | 192 (96.0)       | 2.78        | -1-7       | 10 (4.1)       | 7 (3.5)        | -14.63        | -33-4          | 6 (2.5)        | 1 (0.5)       | -80.00        | -111--49       |
| 45-54               | 133 (91.7)       | 134 (97.8)       | 6.65        | 2-12       | 7 (4.8)        | 1 (0.7)        | -85.42        | -128--43       | 5 (3.4)        | 2 (1.5)       | -55.88        | -83--29        |
| 55-64               | 95 (90.5)        | 52 (96.3)        | 6.41        | -1-14      | 4 (3.8)        | 1 (1.9)        | -50.00        | -90--10        | 6 (5.7)        | 1 (1.9)       | -66.67        | -113--20       |
| 65+                 | 67 (90.5)        | 73 (98.6)        | 8.95        | 2-16       | 5 (6.8)        | 0 (0)          | -100.00       | -              | 2 (2.7)        | 1 (1.4)       | -48.15        | 0              |
| <b>Education</b>    |                  |                  |             |            |                |                |               |                |                |               |               |                |
| None                | 127 (86.4)       | 80 (88.9)        | 2.89        | -6-11      | 12 (8.2)       | 7 (7.8)        | -4.88         | -30-20         | 8 (5.4)        | 3 (3.3)       | -38.89        | -0.67--0.10    |
| Primary             | 488 (91.7)       | 410 (97.4)       | 6.22        | 3-9        | 22 (4.1)       | 7 (1.7)        | -58.54        | -74--43        | 22(4.1)        | 4 (1)         | -75.61        | -0.95--0.56    |
| Secondary           | 294 (94.8)       | 259 (97.7)       | 3.06        | 0-6        | 12 (3.9)       | 6 (2.3)        | -41.03        | -59-0.00       | 4 (1.3)        | 0 (0)         | -100.00       | 0              |
| Tertiary            | 23 (100)         | 27 (100)         | 0.00        | 0          | 0 (0)          | 0 (0)          | 0.00          | -              | 0 (0)          | 0 (0)         | 0.00          | -              |
| University          | 22 (100)         | 22 (95.7)        | -4.30       | -13-4      | 0 (0)          | 1 (4.3)        | 0.00          | -              | 0 (0)          | 0 (0)         | 0.00          | -              |
| <b>Religion</b>     |                  |                  |             |            |                |                | 0.00          | -              |                |               |               |                |
| Anglican            | 225 (91.5)       | 248 (98.8)       | 7.98        | 4-12       | 12 (4.9)       | 2 (0.8)        | -83.67        | -114--53       | 9 (3.7)        | 1 (0.4)       | -89.19        | -126--52       |
| Roman Catholic      | 90 (96.8)        | 80 (97.6)        | 0.83        | -4-6       | 1 (1.1)        | 2 (2.4)        | 118.18        | -              | 2 (2.2)        | 0 (0)         | -100.00       | 0              |
| Pentecostal         | 97 (94.2)        | 98 (95.1)        | 0.96        | -5-7       | 3 (2.9)        | 3 (2.9)        | 0.00          | -27-27         | 3 (2.9)        | 2 (1.9)       | -34.48        | -62--7         |
| Muslim              | 525 (91.6)       | 362 (95.3)       | 4.04        | 1-7        | 30 (5.2)       | 14 (3.7)       | -28.85        | -42--15        | 18 (3.1)       | 4 (1.1)       | -64.52        | -82--47        |
| Other               | 17 (89.5)        | 10 (100)         | 11.73       | -2-26      | 0 (0)          | 0 (0)          | 0.00          | -              | 2 (10.5)       | 0 (0)         | 0.00          | -              |
| <b>Overall</b>      | <b>954(92.3)</b> | <b>798(96.6)</b> | <b>4.6</b>  | <b>3-7</b> | <b>46(4.4)</b> | <b>21(2.5)</b> | <b>-43.18</b> | <b>-53--33</b> | <b>33(3.3)</b> | <b>7(0.8)</b> | <b>-75.76</b> | <b>-89--62</b> |

259

260 **Reporting ADEs by the respondents**

261 While at baseline only 21% mentioned that they had experienced an ADE, this proportion more  
262 than doubled to 44% after the CDS intervention. However, there are variations in the different  
263 demographic groups, for instance, there was a reduction among those who had attained tertiary  
264 education level, as shown in table 5.

265

266

267 *Table 5: Reporting of ADEs by social demographic characteristics before and after the CDS intervention*

268

|                     | Yes              |                |               |                | No               |                  |               |               | DK             |                |               |               |
|---------------------|------------------|----------------|---------------|----------------|------------------|------------------|---------------|---------------|----------------|----------------|---------------|---------------|
|                     | Before           | After          | % age diff.   | 95% CI         | Before           | After            | % age diff.   | 95% CI        | Before         | After          | % age diff.   | 95% CI        |
| <b>Age category</b> |                  |                |               |                |                  |                  |               |               |                |                |               |               |
| 15-24               | 51(31.3)         | 43(43)         | 37.38         | 18-57          | 108(66.3)        | 57(57)           | -14.03        | -29-1         | 4(2.5)         | 0(0)           | -100.00       | 0             |
| 25-34               | 109(35.9)        | 61(42.1)       | 17.27         | 2-32           | 183(60.2)        | 84(57.9)         | -3.82         | -16-9         | 12(3.9)        | 0(0)           | -100.00       | 0             |
| 35-44               | 80(32.9)         | 61(47.3)       | 43.77         | 28-60          | 159(65.4)        | 67(51.9)         | -20.64        | -34--7        | 4(1.6)         | 1(0.8)         | -50.00        | -76--24       |
| 45-54               | 47(32.4)         | 43(46.7)       | 44.14         | 24-64          | 96(66.2)         | 47(51.1)         | -22.81        | -40--6        | 2(1.4)         | 2(2.2)         | 57.14         | 31-83         |
| 55-64               | 36(34.3)         | 13(35.1)       | 2.33          | -28-32         | 68(64.8)         | 24(64.9)         | 0.15          | -22-22        | 1(1.0)         | 0(0)           | -100.00       | 0             |
| 65+                 | 26(35.1)         | 16(36.4)       | 3.70          | -26-34         | 46(62.2)         | 28(63.6)         | 2.25          | -20-25        | 2(2.7)         | 0(0)           | -100.00       | 0             |
| <b>Education</b>    |                  |                |               |                |                  |                  |               |               |                |                |               |               |
| Primary             | 180(33.8)        | 120(42.4)      | 25.44         | 14-37          | 340(63.9)        | 161(56.9)        | -10.95        | -20--2        | 12(2.3)        | 2(0.7)         | -69.57        | -91--48       |
| Secondary           | 109(35.2)        | 73(40.1)       | 13.92         | 0-28           | 194(62.6)        | 109(59.9)        | -4.31         | -16-7         | 7(2.3)         | 0(0)           | -100.00       | 0             |
| Tertiary            | 12(52.2)         | 8(40)          | -23.37        | -68-21         | 10(43.5)         | 12(60)           | -86.21        | -118--55      | 1(4.3)         | 0(0)           | -100.00       | 0             |
| University          | 10(45.5)         | 13(65)         | 42.86         | 16-70          | 12(54.5)         | 7(35)            | -35.78        | -73-1         | 0(0)           | 0(0)           | 0.00          | -             |
| <b>Religion</b>     |                  |                |               |                |                  |                  |               |               |                |                |               |               |
| Anglican            | 89(36.2)         | 66(38.6)       | 6.63          | -9-22          | 152(61.8)        | 104(60.8)        | -1.62         | -14-11        | 5(2.0)         | 1(0.6)         | -70.00        | -98--42       |
| Roman Catholic      | 23(24.7)         | 20(41.7)       | 68.83         | 41-96          | 69(74.2)         | 28(58.3)         | -21.43        | -41--1        | 1(1.1)         | 0(0)           | -100.00       | 0             |
| Pentecostal         | 45(43.7)         | 32(46.4)       | 6.18          | -16-29         | 55(53.4)         | 37(53.6)         | 0.37          | -20-21        | 3(2.9)         | 0(0)           | -100.00       | 0             |
| Muslim              | 189(33)          | 115(45.6)      | 38.18         | 27-49          | 369(64.4)        | 135(53.6)        | -16.77        | -26--7        | 15(2.6)        | 2(0.8)         | -69.23        | -92--47       |
| Other               | 3(15.8)          | 4(57.1)        | 261.39        | 195-328        | 15(78.9)         | 3(42.9)          | -45.63        | -98-7         | 1(5.3)         | 0(0)           | -100.00       | 0             |
| <b>Overall</b>      | <b>349(20.5)</b> | <b>237(44)</b> | <b>114.6%</b> | <b>137-217</b> | <b>660(63.8)</b> | <b>307(29.7)</b> | <b>-53.5%</b> | <b>-84--3</b> | <b>25(2.4)</b> | <b>3(0.29)</b> | <b>-87.9%</b> | <b>-50-21</b> |

270

271 **Commonly reported adverse events**

272 After the CDS intervention, there was an increase of more than 10% in the population who  
273 would consider reporting serious reactions (19%, 95% CI =16-21%), reactions to newly  
274 introduced drugs (15%, 95% CI = 11-18%), unexpected reactions (16%, 95% CI = 13-19%)  
275 and reactions due to herbal and conventional medicines taken together (20%, 95% CI= 16-  
276 24%) as shown in table 6. Regarding the top most five ADE types that the respondents would  
277 report, it was found that serious reactions became more important after the CDS intervention.  
278 The rest of the order of importance for reactions to be reported largely remained unchanged  
279 from uncertain reactions to those of newly introduced drugs on the market, followed by  
280 unexpected reactions and reactions to drugs that have been on the market for long in descending  
281 order.

282 **Table 6: A comparison of the type of adverse events that the respondents would report before and after the CDS intervention**

|                                                                | Yes/Agree n (%) |            |         |        | No/Disagree n (%) |            |         |          | Don't know n (%) |          |         |         |
|----------------------------------------------------------------|-----------------|------------|---------|--------|-------------------|------------|---------|----------|------------------|----------|---------|---------|
|                                                                | Baseline        | End-line   | %change | 95% CI | Baseline          | End-line   | %change | 95% CI   | Baseline         | End-line | %change | 95% CI  |
| Uncertain or suspected ADEs                                    | 807 (78.0)      | 721 (87.3) | 11.92   | 9-15   | 133 (12.9)        | 84 (10.2)  | -20.93  | -28--14  | 94 (9.1)         | 21 (2.5) | -72.53  | -80--65 |
| Certain negative ADEs                                          | 697 (67.4)      | 634 (76.7) | 13.80   | 10-18  | 235 (22.7)        | 168 (20.3) | -10.57  | -17--4   | 102 (9.9)        | 24 (2.9) | -70.71  | -78--63 |
| Serious reactions                                              | 797 (77.1)      | 756 (91.5) | 18.68   | 16-21  | 143 (13.8)        | 57 (6.9)   | -50.00  | -57--43  | 94 (9.1)         | 13 (1.6) | -82.42  | -90--75 |
| Mild reactions                                                 | 728 (70.4)      | 573 (69.4) | -1.42   | -6-3   | 243 (23.5)        | 246 (29.8) | 26.81   | 20-33    | 63 (6.1)         | 7 (0.9)  | -85.25  | -93--78 |
| Reactions to drugs which have been on market for a long period | 718 (69.4)      | 649 (78.6) | 13.26   | 10-17  | 223 (21.6)        | 146 (17.7) | -18.06  | -24--12  | 93 (9.0)         | 31 (3.7) | -58.89  | -65--52 |
| Reactions to newly introduced drugs                            | 770 (74.5)      | 706 (85.5) | 14.77   | 11-18  | 147 (14.2)        | 73(8.8)    | -38.03  | -46--31  | 117 (11.3)       | 47 (5.7) | -49.56  | -57--42 |
| Common or well-known reactions                                 | 639 (61.8)      | 483 (58.5) | -5.34   | -10--1 | 285 (27.6)        | 315 (38.1) | 38.04   | 32-44    | 110 (10.6)       | 28 (3.4) | -67.92  | -75--61 |
| Unexpected reactions                                           | 737 (71.3)      | 683 (82.7) | 15.99   | 13-19  | 186 (18.0)        | 107 (12.9) | -28.33  | -35--21  | 111 (10.7)       | 36 (4.4) | -58.88  | -66--52 |
| Possible interaction with other drugs                          | 660 (63.8)      | 582 (70.5) | 10.50   | 6-15   | 231 (22.3)        | 179 (21.7) | -2.69   | -9-4     | 143 (13.8)       | 65 (7.9) | -42.75  | -50--35 |
| Reaction due to herbal medicine                                | 573 (55.4)      | 520 (62.9) | 13.54   | 9-18   | 370 (35.8)        | 279 (33.8) | -5.59   | -11-0.00 | 91 (8.8)         | 27 (3.3) | -62.50  | -70--55 |
| Reactions due to herbal & conventional medicine taken together | 643 (62.2)      | 616 (74.6) | 19.94   | 16-24  | 301 (29.1)        | 179 (21.7) | -25.43  | -31--19  | 90 (8.7)         | 31 (3.7) | -57.47  | -64--51 |

283 ADEs = adverse drug events

284

285 **Best way to engage the community**

286 The radio was reported as the best way to deliver the messages sensitizing the community  
287 members about ADE reporting among the respondents, whereas community meetings was  
288 regarded the best by health providers as shown in figure 1. The health-worker and the health  
289 facility was found to increasingly play a vital role of ADE sensitization among health workers  
290 and respondents. Residents of the community across the board were happy with the community  
291 dialogue meetings as a way of raising their awareness and as the best way to engage the  
292 community on ADE matters.

293 *Fig 1: Comparison of options for reaching the community members with the ADE message*  
294 *between the community respondents and health providers.*

295

296

297 **DISCUSSION**

298 Our results suggest that the community dialogues and sensitization intervention increases  
299 knowledge, attitudes and reporting practices of adverse drug events across all demographic  
300 parameters in the rural communities. The population that reported having ever experienced an  
301 ADE more than doubled during the time of the CDS intervention. We also found that the  
302 intervention was widely acceptable through the focus group discussions and community  
303 meetings that we held. The local leaders were involved in mobilization and the local healthcare  
304 providers strengthened the messages on health consciousness and ADE awareness by the  
305 community. This study took advantage of the MUCHAP data collectors who were familiar  
306 with the community as they routinely collected data for the IMHDSS household surveys. The  
307 extent that such facilitated community meetings influence the quality of health care lies in the  
308 social capital that they raise. They provide an opportunity for networking and critical practical  
309 and emotional support, often leading to formulation of positive action plans and solidarity to

310 action them<sup>13</sup>. A number of community dialogues and similar interventions have been  
311 implemented in similar settings but there is a paucity of data evaluating such interventions in  
312 the published literature. In line with results from our study, published evaluation data show  
313 positive effects of similar community-level interventions to improve awareness and attitude  
314 change regarding health issues<sup>13-15</sup>.

315

316 The results of this study indicated that, while the public is inclined to acquire information about  
317 ADEs and realize the benefits of reporting ADEs, their understanding of their essential role in  
318 reporting ADEs was insufficient. To increase awareness about ADEs, health workers reported  
319 that community meetings was the best method of raising their awareness and as the best way  
320 to engage the community on ADE matters while consumers suggested media campaigns on  
321 radios as the best way to deliver the messages sensitizing the community members about ADE  
322 reporting. One of the underlying assumption of the CDS intervention model was that individual  
323 exposure to the concept of monitoring and reporting ADEs would affect cognitions that  
324 continue to affect the behaviour of actual reporting of the events over a short term. Other  
325 studies have also reported the importance of media in raising community awareness and  
326 increase the likelihood of achieving new behaviour<sup>15, 16</sup>. This indicates that a combination of  
327 community dialogues and use of media campaigns on radios to sensitize people could increase  
328 reporting of ADEs in line with suggestions from other studies<sup>15-18</sup>. The present study  
329 demonstrated that the effect of CDS interventions would help improve ADE reporting.  
330 However, community interventions are time bound and hence continuous public educational  
331 programs on pharmacovigilance are essential to enhance reporting in the end. The long-term  
332 effect of especially the sensitization part of the model may operate through social and  
333 institutional pathways in addition to the individual learning that will require sustained levels  
334 of exposure through multiple channels over longer periods. Such effects tend to accumulate

335 detectable change on certain sections of the audience over time and therefore should be  
336 assessed over time for a complete picture.

337

338 We found a significant improvement in attitudes of respondents towards reporting of ADEs.  
339 For example, in regard to whether it was necessary to report the adverse drug effects, there was  
340 an overall increase of 5% (95%CI =3-7%) after the implementation of the CDS intervention.  
341 There was an increase in the population who would consider reporting serious reactions,  
342 reactions to newly introduced drugs, unexpected reactions and reactions due to herbal and  
343 conventional medicines taken together. This showed that more than 15% of this community  
344 gained information about the negative effects of drugs in the short time of study. Similar results  
345 were found by other studies assessing educational interventions to improve attitudes of  
346 healthcare professionals and the adverse drug reaction-reporting rate in return<sup>19, 20</sup>.

347

348 Health providers and consumers' willingness to report was reflected by an increase in the  
349 number of ADE reports submitted after the intervention. In regard to reporting practices, there  
350 was a change in respondents' willingness to report serious reactions, reactions to newly  
351 introduced drugs, unexpected reactions and reactions due to herbal and conventional medicines  
352 taken together after the CDS intervention. The increase in willingness of health providers to  
353 report ADEs after community intervention was also reported by other studies<sup>21-23</sup>. However,  
354 the actual reporting could not be measured immediately since it's an impact measure and  
355 therefore could not be ascertained immediately after the CDS intervention. The study results  
356 are still very informative for a policy on patient ADE reporting.

357

358 In Uganda, patients and consumers report adverse drug events either indirectly through their  
359 healthcare provider or directly through the newly established online reporting system<sup>24</sup>. In the



360 rural setting, the capacity of patients to report was assessed by a proxy variable seeking to find  
361 out if the respondents had ever experienced or reported an ADE both before and after the CDS  
362 intervention. The 115% (95%CI =137-217) increase in recognition and reporting the ADE to  
363 the researchers is evidence that a separate system needs to be established for direct patient or  
364 consumer reporting. The launch of this system should be accompanied by a lot of sensitization  
365 delivered through multiple channels and with reporting tools that are tailored to the level of  
366 literacy and understanding of the rural community. There was no resistance to the intervention  
367 both at the community level and among the health workers. The increased reporting rate from  
368 this study and the wide acceptability of the CDS intervention in these two districts are  
369 ingredients for success of such a model of patient ADE reporting that can possibly be replicated  
370 in other limited resource settings. However, this successful implementation of the intervention  
371 in the study area could be because the respondents are used to research activities in the health  
372 demographic surveillance site and makes it hard to decline it. This means that, for a successful  
373 implementation of the same intervention in other settings, there is need for vigorous  
374 sensitization to prepare the communities and increase awareness.

375

376 Despite the initial increase of respondents' and healthcare providers' knowledge and attitudes  
377 towards ADE reporting following the CDS intervention, the influence of this intervention on  
378 the practice of ADEs reporting was not studied, which presents a major limitation in this study.  
379 The effect of the CDS intervention that was studied shortly after implementation, may not  
380 reflect the actual effect in the long term. Additionally, this study was conducted among  
381 healthcare providers and consumers from the rural settings from one region. Hence, the results  
382 of this study may be cautiously generalizable to rural settings in other regions.

383

384 The baseline and end-line surveys had limitations as to the CDS intervention model's  
385 contribution to the changes in knowledge, perceptions and practice of patient ADE reporting  
386 given that randomly selected participants (before and after CDS) may, or may not have been  
387 beneficiaries of the project. There are also limits of the extent to which we can track direct  
388 changes to knowledge, practice and attitudes at an individual level given we did not track the  
389 same individuals throughout the life of the project.

390

391 There was no balance in samples selected at the baseline and at the end line surveys. This  
392 brought about overlap in frequencies and percentages by some demographic characteristics,  
393 for example in the gender and occupation variables. This could best be avoided by using exactly  
394 the same individuals before and after the intervention.

395

## 396 **CONCLUSION**

397 In conclusion, the results of the current study showed that community dialogues and  
398 sensitization as a community intervention can increase knowledge, attitude and practices for  
399 reporting of ADEs, and that the respondents were able to apply the knowledge they gained  
400 from dialogues into their everyday life leading to increased reporting. Following the CDS  
401 intervention, the knowledge and attitude toward the ADE reporting seem to have improved.  
402 Hence, to improve ADE reporting among health-care professionals, there is a need to conduct  
403 periodic workshops and continued medical education frequently to sensitize them.

404

405 Despite having some fair knowledge that medicines have a potential to cause harm, the  
406 community shows signs of willingness to report the occurrence of adverse events through the  
407 preferred community channels, as well as to their healthcare providers. Some community  
408 members have experienced and reported ADEs to their healthcare providers. Further studies

409 may be necessary to evaluate the impact of community interventions in the long-term effect  
410 after implementing the intervention. In its current state, the CDS intervention model is highly  
411 beneficial and can be adapted for consumer reporting in limited resource settings.

412

## 413 **DECLARATIONS**

### 414 **Ethics approval and consent to participate**

415 The study protocol was approved by the Mildmay Uganda research and ethics committee

416 (REC REF 0604-2017) and Uganda National council of Science and Technology (HS 2247),

417 the institution responsible for national research clearance in accordance with the World

418 Medical Association Helsinki Declaration. Permission to conduct the study in the area was

419 also obtained from NDA, the local administration of Iganga and Mayuge Districts, IMHDSS

420 and MUCHAP. Written informed consent was obtained from the participants

### 421 **Consent for publication**

422 Not applicable

423

### 424 **Availability of data and material**

425 The datasets generated and analyzed during the current study are not publicly available but

426 are available from the corresponding author on reasonable request.

427

### 428 **Author's Contribution**

429 HBN and DK designed the study. DAK made substantial contributions to conception,

430 design of the study and acquisition of the data. LM, DK and HBN analysed and

431 interpreted the data. LM was a major contributor in writing the manuscript. SO, AS and NS

432 made substantial contributions during the review of the manuscript. All authors read and

433 approved the final manuscript.

434

435

436 **Competing interests**

437 Helen Byomire Ndagije, Leonard Manirakiza, Dan Kajungu, Edward Galiwango, Donna  
438 Asiimwe Kusemererwa, Sten Olsson, Anne Spinewine, Niko Speybroeck have no conflicts of  
439 interest that are directly relevant to the content of this study. This publication was supported  
440 by an agreement from National Drug Authority (NDA). Its contents are solely the  
441 responsibility of the authors and do not necessarily represent the official views of the  
442 National Drug Authority

443 **Funding**

444 The study was supported with funds from the National Drug Authority.

445

446 **Acknowledgements**

447 The authors express their profound gratitude to all patients and healthcare professionals who  
448 participated in this study. We are very grateful to the National Drug Authority for funding  
449 this study and to the Makerere University Centre for Health and Population Research team  
450 for letting us use the Iganga-Mayuge Health and Demographic Surveillance Site as a platform  
451 for data collection and data processing. Gratitude also goes to all research assistants who  
452 spent long hours during data collection and analysis. Finally, we thank the study participants  
453 in Iganga, Mayuge districts and the community leadership as well as the district authorities in  
454 those areas for allowing us to access all public health facilities at our convenience.

455

456

457

458

459

## 460 REFERENCES

- 461 1. Buajordet I, Ebbesen J, Erikssen J, Brørs O, Hilberg T. Fatal adverse drug events: the  
462 paradox of drug treatment. *J Intern Med* 2001; 250: 327–41.
- 463 2. Ebbesen J, Buajordet I, Erikssen J, Brørs O, Hilberg T, Svaar H, Sandvik L. Drug-  
464 related deaths in a department of internal medicine. *Arch Intern Med* 2001; 161: 2317–  
465 23.
- 466 3. Juntti-Patinen L, Neuvonen PJ. Drug-related deaths in a university central hospital. *Eur J*  
467 *Clin Pharmacol* 2002; 58: 479–82.
- 468 4. Davies EC, Green CF, Taylor S, Williamson PR, Mottram DR, Pirmohamed M. Adverse  
469 drug reactions in hospital in-patients: a prospective analysis of 3695 patient-episodes.  
470 *PLoS ONE* 2009; 4: e4439.
- 471 5. Mehta U, Durrheim DN, Blockman M, Kredo T, Gounden R, Barnes KI. Adverse drug  
472 reactions in adult medical inpatients in a South African hospital serving a community  
473 with a high HIV/AIDS prevalence: prospective observational study. *Br J Clin Pharmacol*  
474 2008; 65: 396–406.
- 475 6. Uppsala Monitoring Centre. Glossary of pharmacovigilance terms. 2017 [cited 27 Feb 2018].  
476 Available at: [https://www.who.unc.org/global-pharmacovigilance/global-](https://www.who.unc.org/global-pharmacovigilance/global-pharmacovigilance/glossary/)  
477 [pharmacovigilance/glossary/](https://www.who.unc.org/global-pharmacovigilance/global-pharmacovigilance/glossary/).
- 478 7. Ndagije, H., Nambasa, V., Namagala, E., Nassali, H., Kajungu, D., Sematiko, G., ... Pal,  
479 S. Targeted Spontaneous Reporting of Suspected Renal Toxicity in Patients Undergoing  
480 Highly Active Anti-Retroviral Therapy in Two Public Health Facilities in Uganda. *Drug*  
481 *Safety*, 2015; 38(4). <http://doi.org/10.1007/s40264-015-0277-9>
- 482 8. The Uganda Gazette. THE NATIONAL DRUG POLICY AND AUTHORITY  
483 (PHARMACOVIGILANCE) REGULATIONS, Pub. L. No. 37 (2014). Uganda.

- 484 Retrieved from <http://www.nda.or.ug/files/downloads/Pharmacovigilance>  
485 Regulation.pdf.
- 486 9. Kiguba R, Karamagi C., Bird S.M. Antibiotic associated suspected adverse drug  
487 reaction among hospitalized patients in Uganda: a prospective cohort study, *Pharma Res*  
488 *Per*, 2017; 5(2), e00298, doi:10.1002/prp2.298
- 489 10. Kiguba R, Karamagi C., Waako P., Ndagije H., Bird C.M. Recognition and reporting of  
490 suspected adverse drug reactions by surveyed healthcare professionals in Uganda: key  
491 determinants. *Bmj open*, 2014; 4(11), e005869, 2014
- 492 11. Sandrine, M., Hellen, C., Sinyangwe, C., Teresa, C., Ssekitooleko, J. Community dia  
493 logues for healthy children – encouraging communities to talk: Learning paper – Malaria  
494 consortium, 2012.
- 495 12. Grishma B., Cathy B., Floriano C., Alfredo C., Rebecca E. CARE International - Safe  
496 Motherhood Endline Report Final Results: Ermera & Covalima, 2017.
- 497 13. Campbell C, Scott K, Nhamo M, Nyamukapa C, Madanhire C, Skovdal M, Sherr L,  
498 Gregson S. Social capital and HIV competent communities: the role of community  
499 groups in managing HIV/AIDS in rural Zimbabwe. *AIDS Care*. 2013; 25 Suppl 1:114–  
500 22.
- 501 14. Tavadze M, Bartel D, Rubardt M. Addressing social factors of adolescent reproductive  
502 health in the Republic of Georgia. *Glob Public Health*. 2009; 4(3):242–52. doi:  
503 10.1080/17441690802713981 PMID:19437213
- 504 15. Hornik R, Yanovitzky I. Using theory to design evaluations of communication  
505 campaigns: the case of the National Youth Anti-Drug Media Campaign. *Communication*  
506 *Theory*. 2003;13:204–24. [[PMC free article](#)][[PubMed](#)] Manuscript, A. (2014). NIH  
507 Public Access, 13(2). <http://doi.org/10.1111/j.1468-2885.2003.tb00289.x>.

- 508 16. Fishbein M, Azjen I. Predicting and changing behaviour: the reasoned action  
509 approach. New York: Psychology Press; 2010.
- 510 17. Oshikoya KA, Awobusuyi JO. Perceptions of doctors to adverse drug reaction reporting  
511 in a teaching hospital in Lagos, Nigeria. *BMC Clin Pharmacol.* 2009;9:14. [PMC free  
512 article] [PubMed]
- 513 18. John LJ, Arifulla M, Cheriathu JJ, Sreedharan J. Reporting of adverse drug reactions: An  
514 exploratory study among nurses in a teaching hospital, Ajman, United Arab Emirates.  
515 *Daru.* 2012;20:44. [PMC free article] [PubMed]
- 516 19. Figueiras A, Herdeiro MT, Polonia J, Gestal-Otero JJ: An educational intervention to  
517 improve physician reporting of adverse drug reactions: a cluster-randomized controlled  
518 trial. *JAMA* 2006, 296:1086-1093.
- 519 20. Bracchi RC, Houghton J, Woods FJ, Thomas S, Smail SA, Routledge PA: A distance-  
520 learning programme in pharmacovigilance linked to educational credits is associated  
521 with improved reporting of suspected adverse drug reactions via the UK yellow card  
522 scheme. *Br J Clin Pharmacol* 2005, 60:221-223.
- 523 21. Manuela T., Elke J., Angelina B., Claudia MW., Stefan NW., Thomas O and Harald M.  
524 Educational intervention to improve physician reporting of adverse drug reactions  
525 (ADEs) in a primary care setting in complementary and alternative medicine. *BMC*  
526 *Public Health* 2009, 9:274 doi:10.1186/1471-2458-9-274
- 527 22. Abu, R., Abu, K., Rizik, M., Aljanabi, R., & Alsakran, L. (2018). Effect of educational  
528 intervention on healthcare providers knowledge and perception towards  
529 pharmacovigilance : A tertiary teaching hospital experience. *Saudi Pharmaceutical*  
530 *Journal.* <http://doi.org/10.1016/j.jsps.2018.03.002>
- 531 23. Subramaniyan G., Selvarajan S., Kishtapati Chenchu R. and Chandrasekaran A. The  
532 Impact of the Educational Intervention on Knowledge, Attitude, and Practice of

533 Pharmacovigilance toward Adverse Drug Reactions Reporting among Health-care  
534 Professionals in a Tertiary Care Hospital in South India. *Journal of Natural Science,*  
535 *Biology, and Medicine*, 2017 Jul-Dec; 8(2): 203–209.  
536 doi: 10.4103/0976-9668.210014; PMCID: PMC5523529 PMID: 28781488  
537 24. Ndagije, H. B., Victoria, N., Manirakiza, L., Kusemererwa, D., Kajungu, D., Olsson, S.,  
538 & Speybroeck, N. (2018). The Burden of Adverse Drug Reactions Due to Artemisinin-  
539 Based Antimalarial Treatment in Selected Ugandan Health Facilities : An Active  
540 Follow-Up Study. *Drug Safety*. <http://doi.org/10.1007/s40264-018-0659-x>

541

542

543

544

545 ***Additional Files***

546

547 Additional file # 1: Household survey questionnaire.doc

548 Title of data:

549 Knowledge Attitudes and Practice (KAP) study on adverse drug reactions – Household  
550 questionnaire

551

552 Description of data

553 This was the questionnaire used to collect data about the households involved in the baseline  
554 and end-line surveys conducted before and after implementation of the community dialogues  
555 and sensitization.

556

557 Additional file # 2: Healthcare provider survey questionnaire.doc



558

559 Title of data:

560 Knowledge Attitudes and Practice (KAP) study on adverse drug reactions – Provider

561 questionnaire

562

563 Description of data

564 This questionnaire was used to collect data about the healthcare providers in the community-

565 based health facilities involved in the baseline and end-line surveys. At least two healthcare

566 workers from each health facility were randomly-selected.

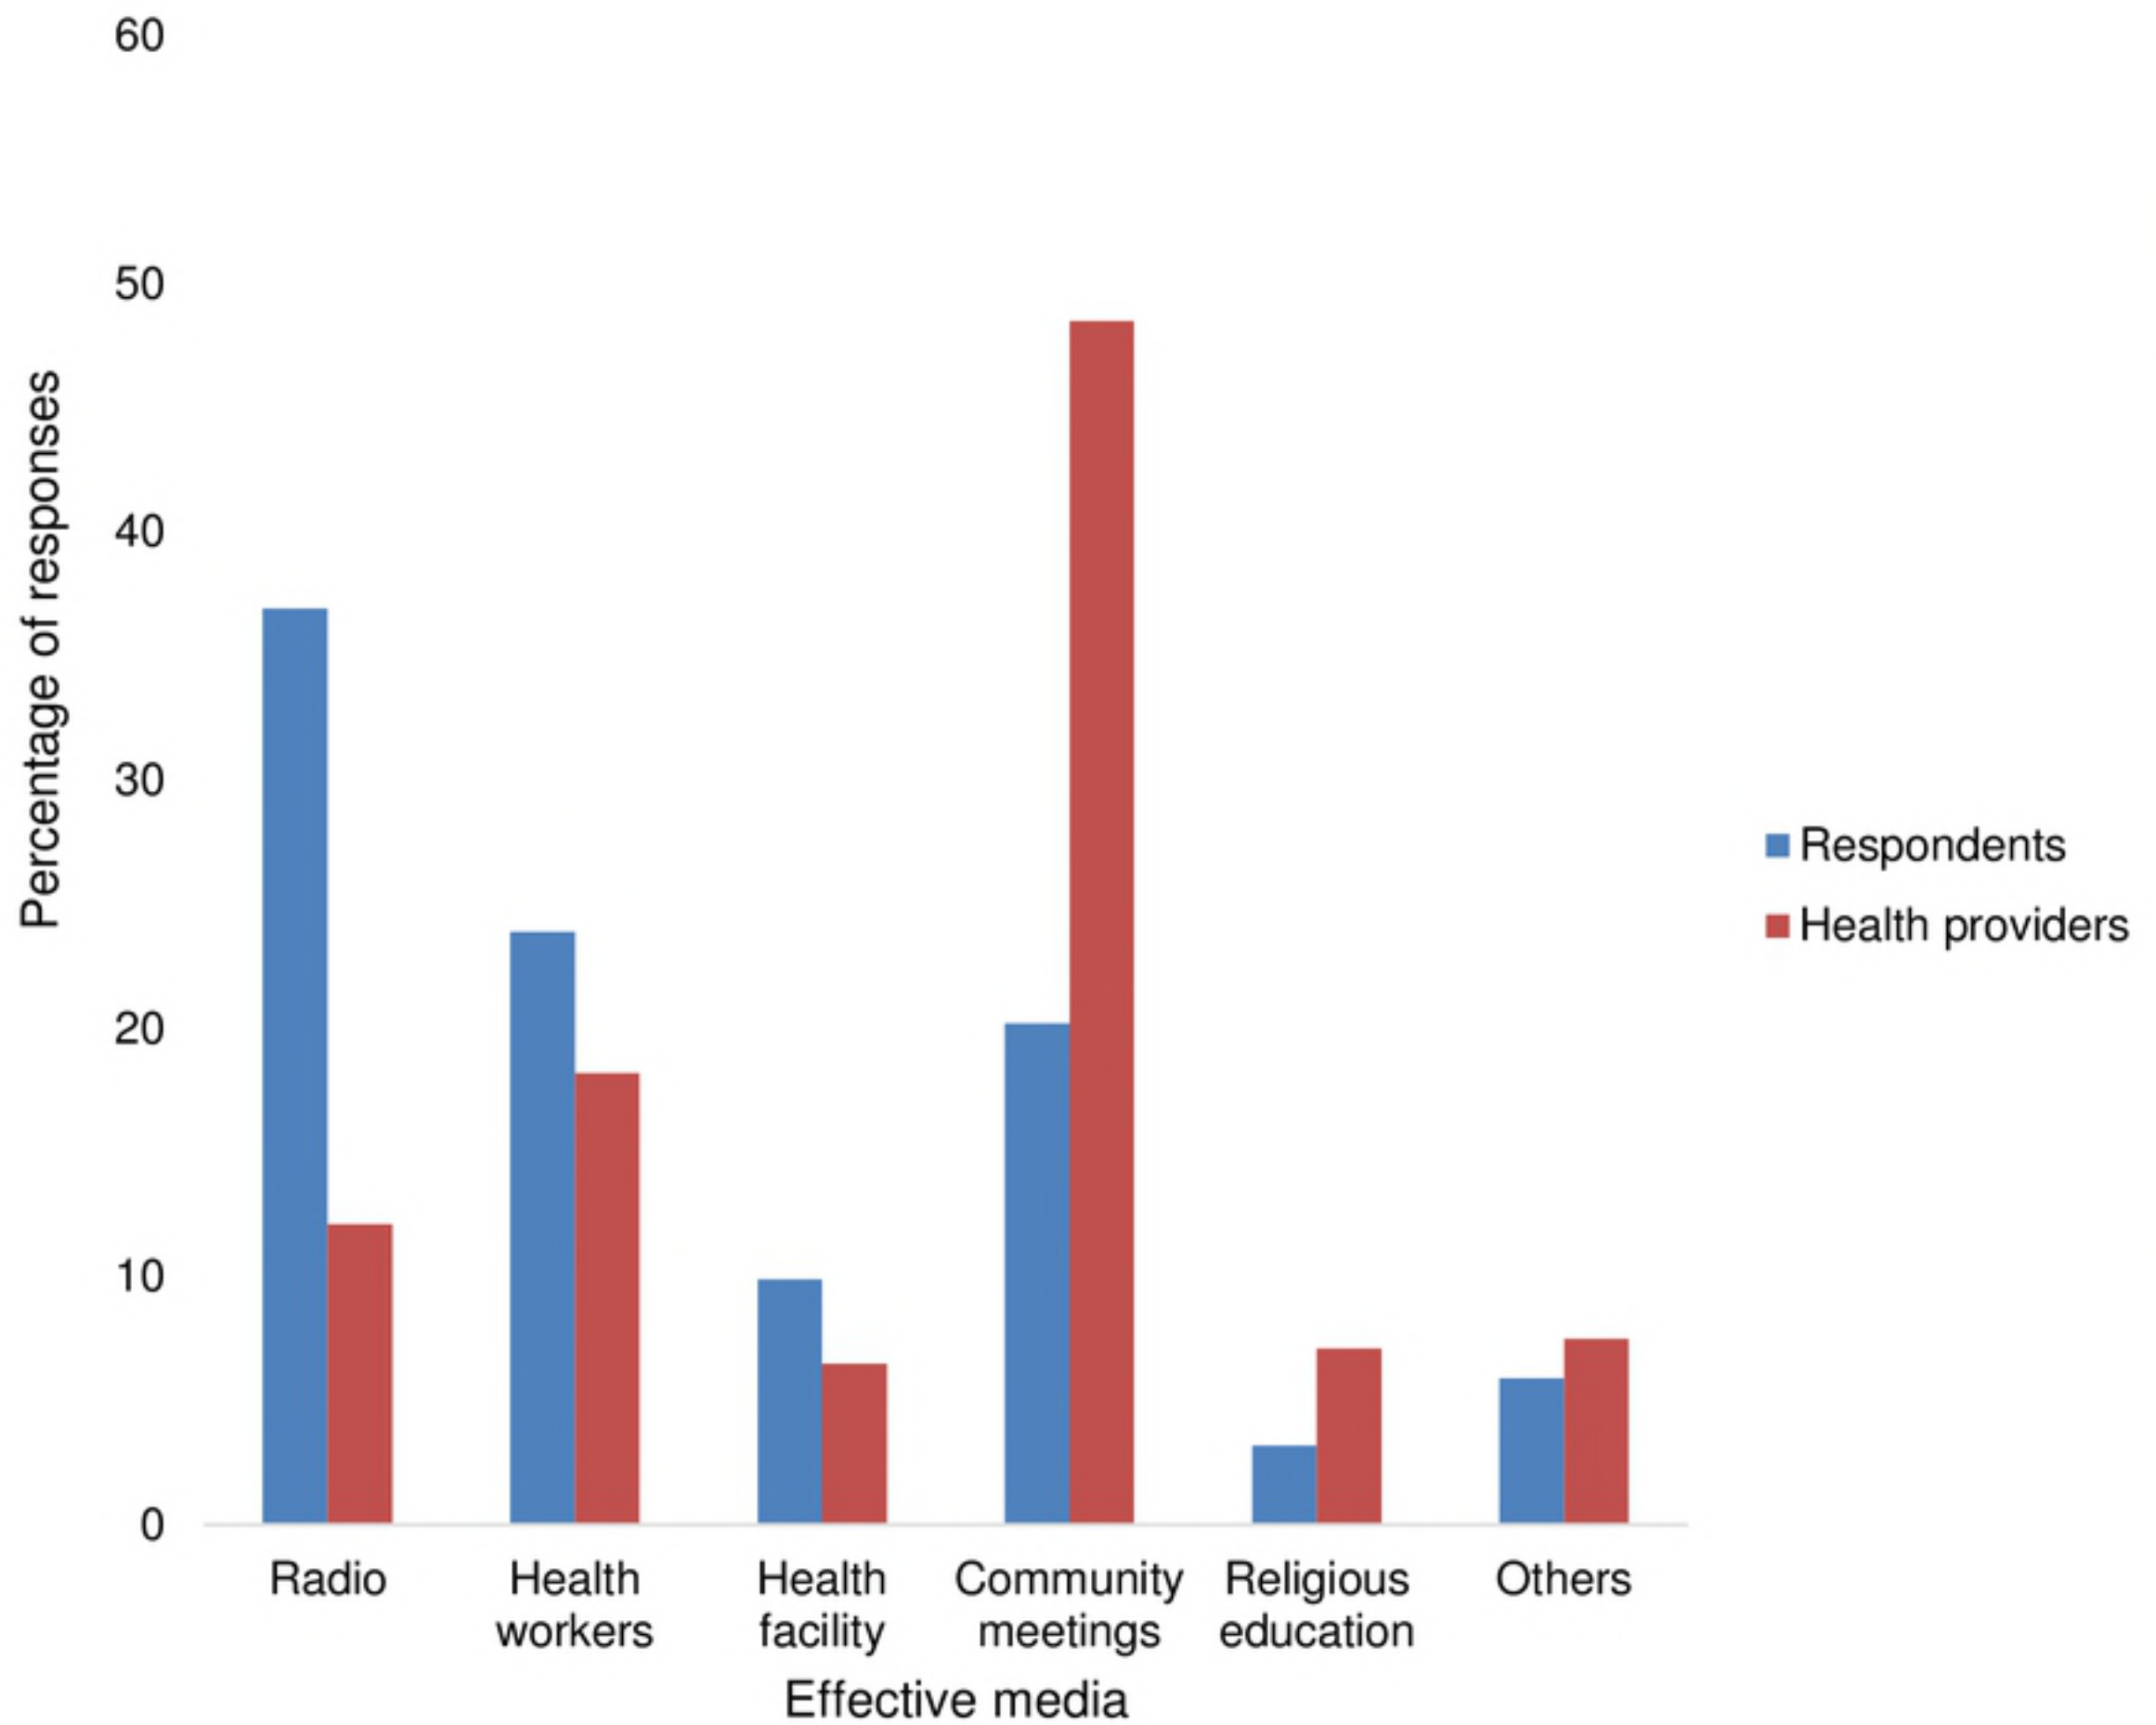

Source: https://www.biorxiv.org/content/10.1101/402503v1.full.pdf
